# Supplementary material for: Evaluating the mosquito vector range for two orthobunyaviruses: Oya virus and Ebinur Lake virus
Source: Parasit Vectors. 2024 May 7;17:204. doi: 10.1186/s13071-024-06295-5 (PMC11077878; doi:10.1186/s13071-024-06295-5)
Supplement: Supplementary file 2 — Additional file 2: Table S2. The equation for the standard curve was used to calculate the viral genome copies in each sample. [file 13071_2024_6295_MOESM2_ESM.xlsx]

## Sheet: Sheet1
Table S2. The equation for the standard curve was used to calculate the viral genome copies in each sample.
Virus	Standard curve	R2
OYAV	y = −3.215x1 + 44.100	0.999
EBIV	y = −3.291x2 + 45.662	1
y: Ct value
x1: lg (OYAV RNA copies/μL)
x2: lg (EBIV RNA copies/μL)
